# Supplementary material for: Formation and growth characteristics of nanostructured carbon films on nascent Ag clusters during room-temperature electrochemical CO2 reduction
Source: Royal Society of Chemistry journal article supplement (doi:10.1039/d1na00876e), 2022-01-01
Supplement: d1na00876e1.pdf [file d1na00876e1.pdf]

### Supporting Information

**Figure S1.** The SEM results of the cross-sectioned Ag electrocatalysts before (a) and after CO<sub>2</sub>RR for 140 min (b).

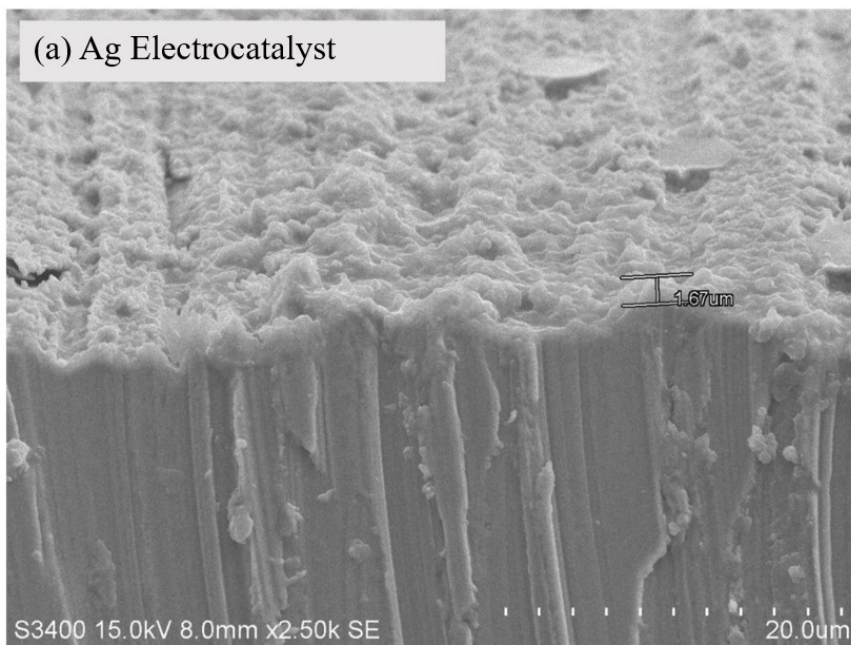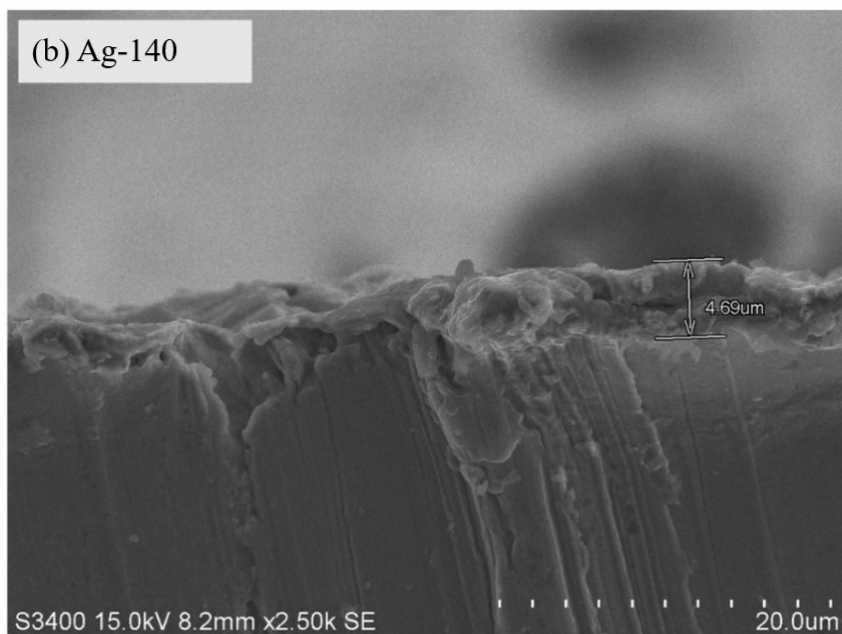

**Figure S2.** The CO<sub>2</sub> conversion after CO<sub>2</sub>RR for 10, 20, 30, 70, and 140 min.

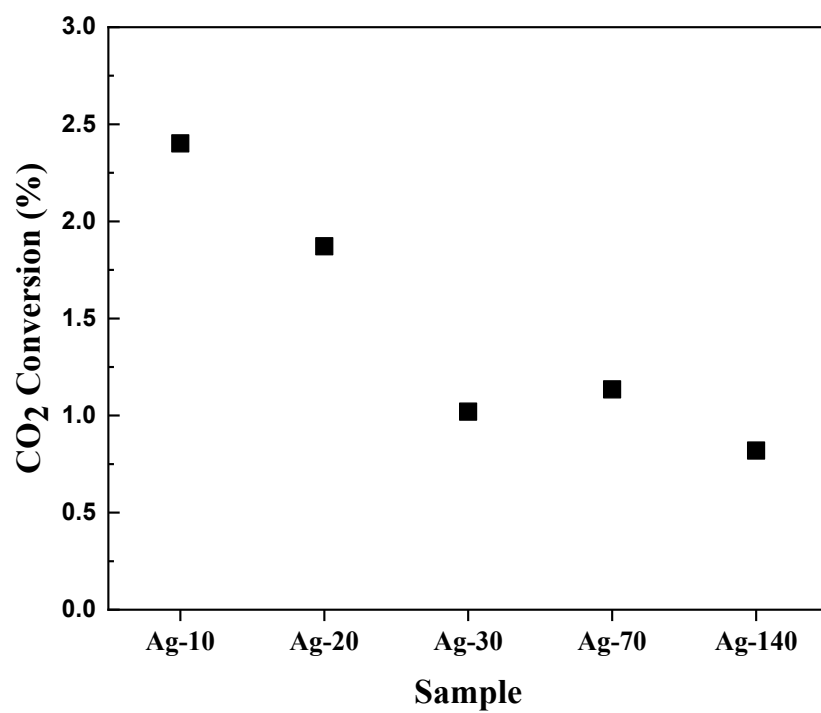

**Figure S3.** The NMR results of Ag-electrocatalyst after CO<sub>2</sub>RR for 10, 20, 30, 70, and 140 min

<sup>13</sup>C-NMR spectra of cathodic results of Ag-electrocatalyst after CO<sub>2</sub>RR for 10, 20, 30, 70, and 140 min

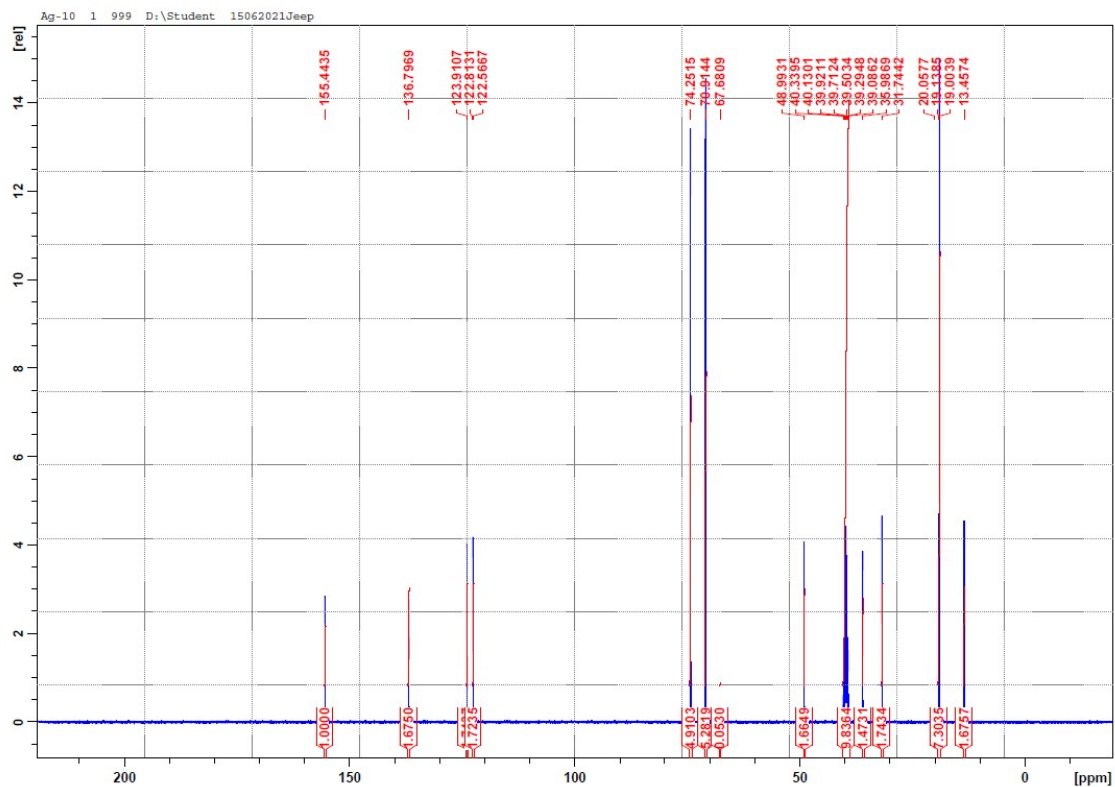

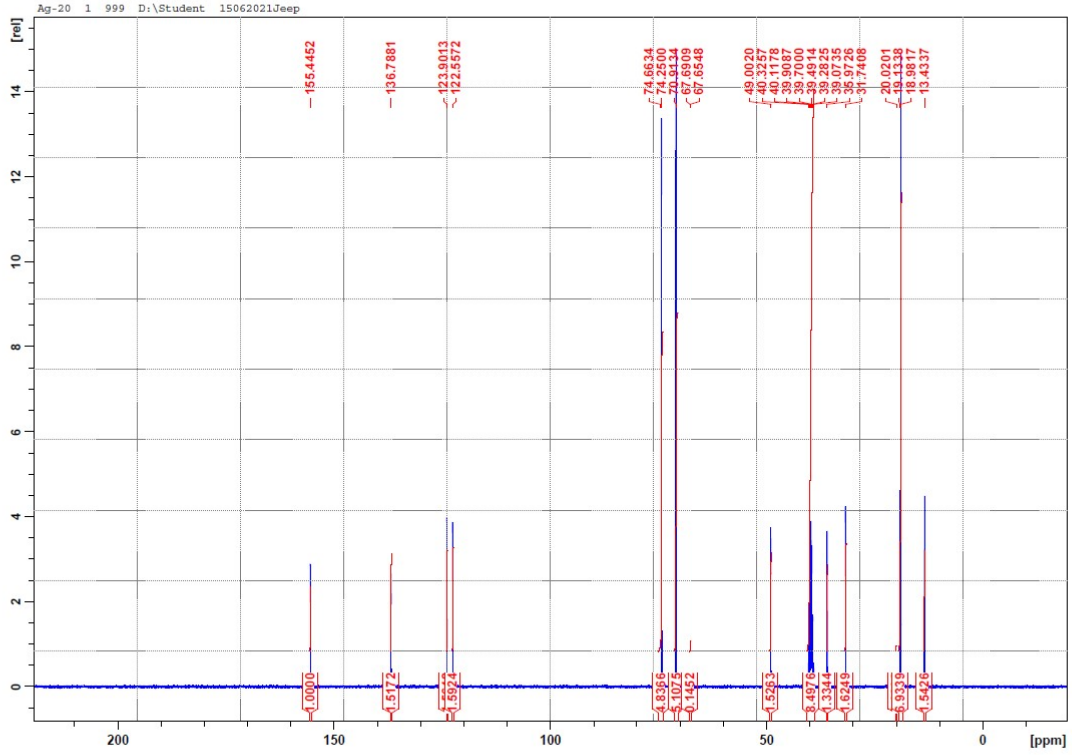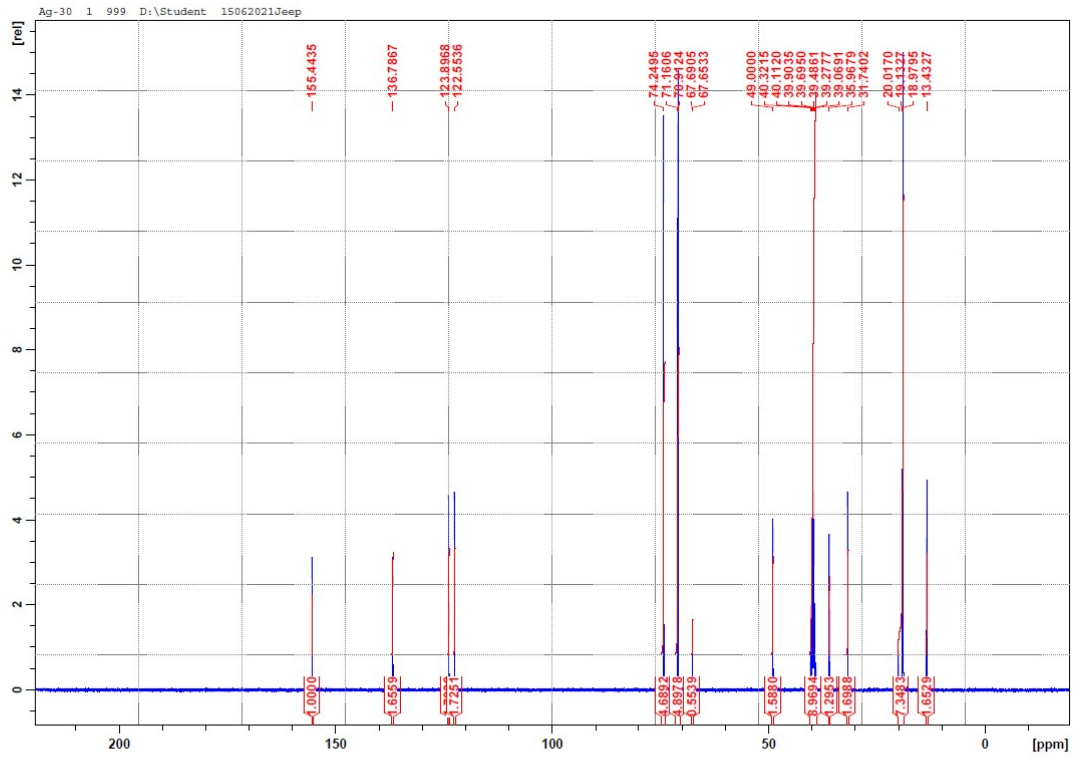

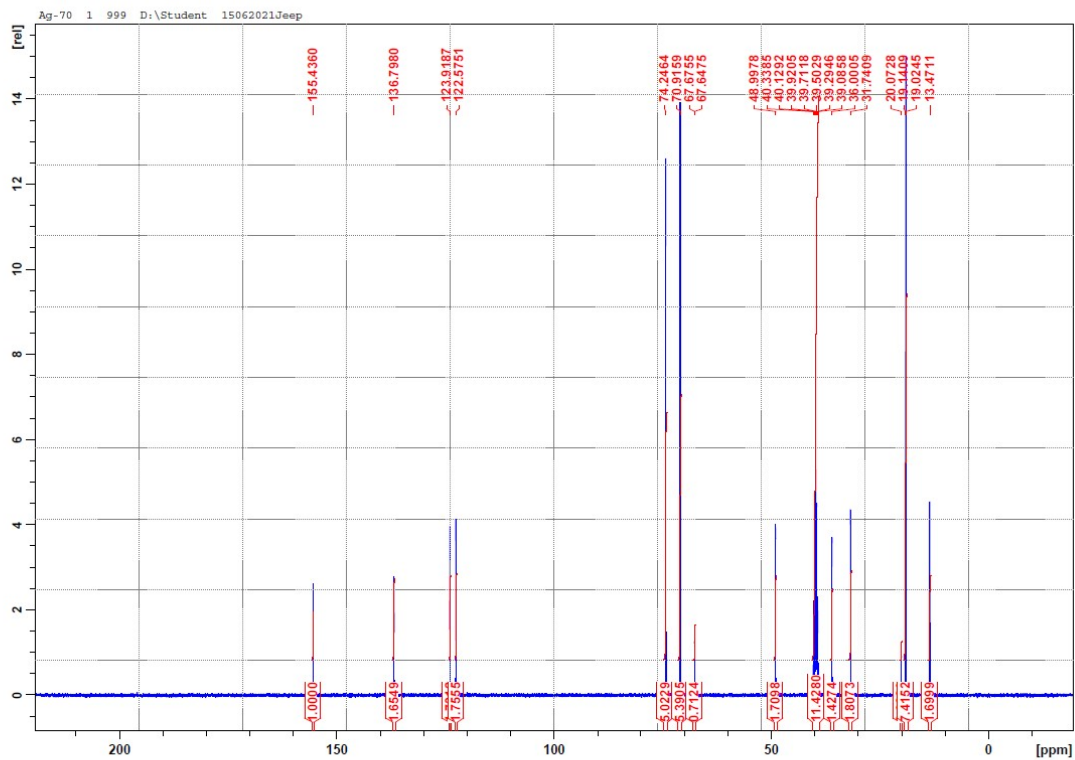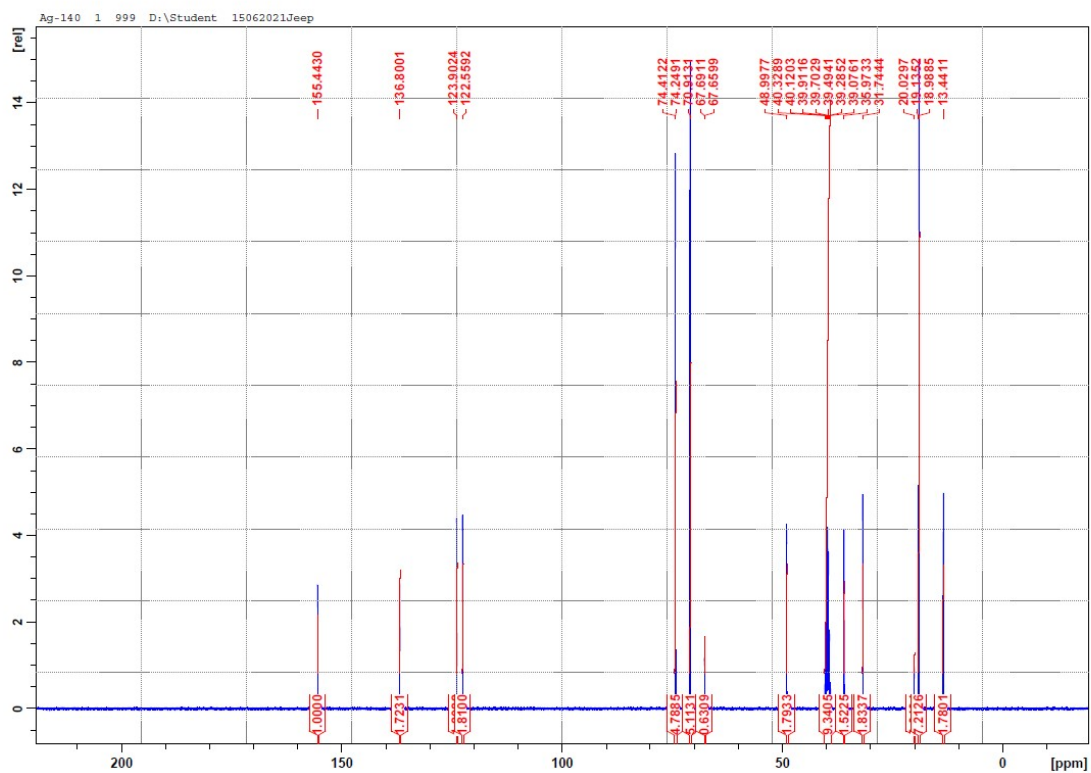

$^1\text{H-NMR}$  spectra of cathodic results of Ag-electrocatalyst after  $\text{CO}_2\text{RR}$  for 10, 20, 30, 70, and 140 min

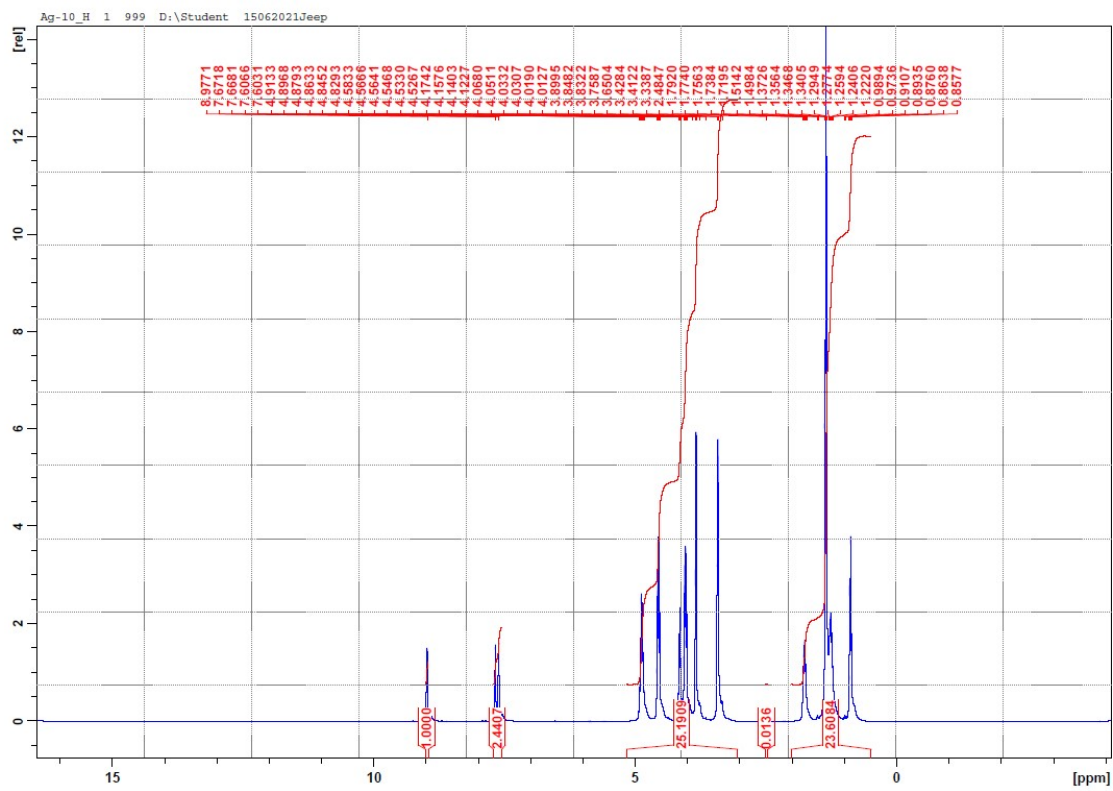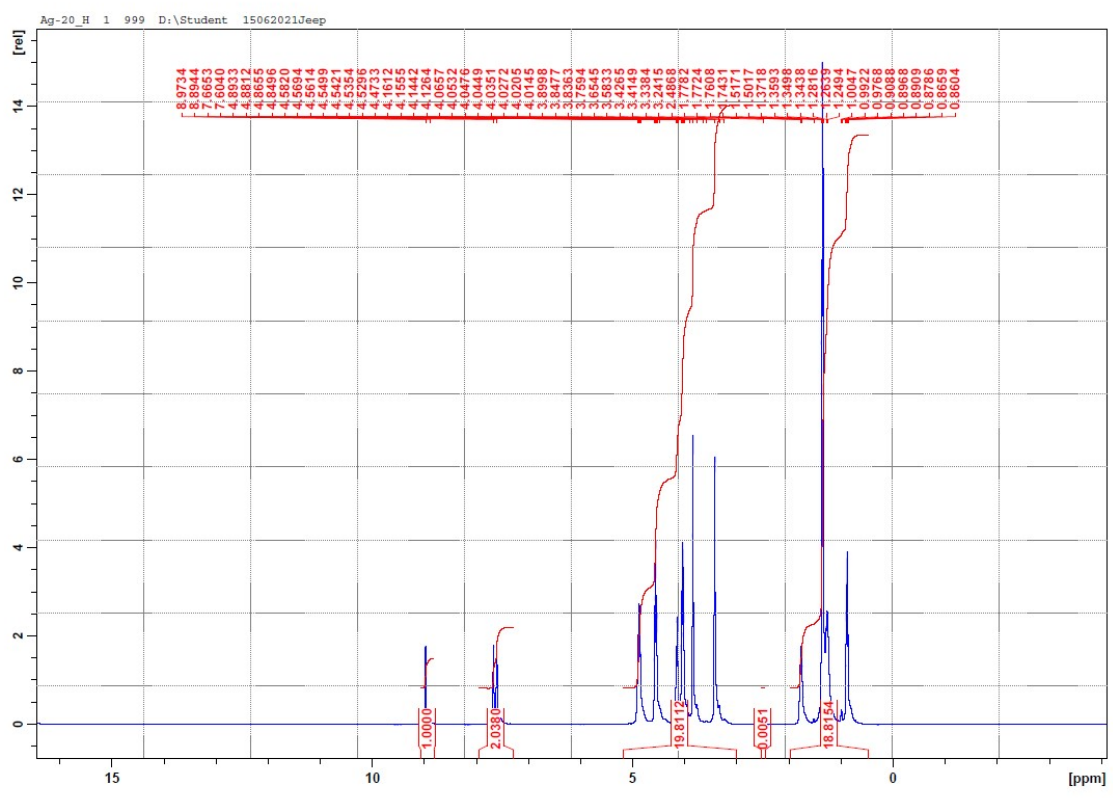

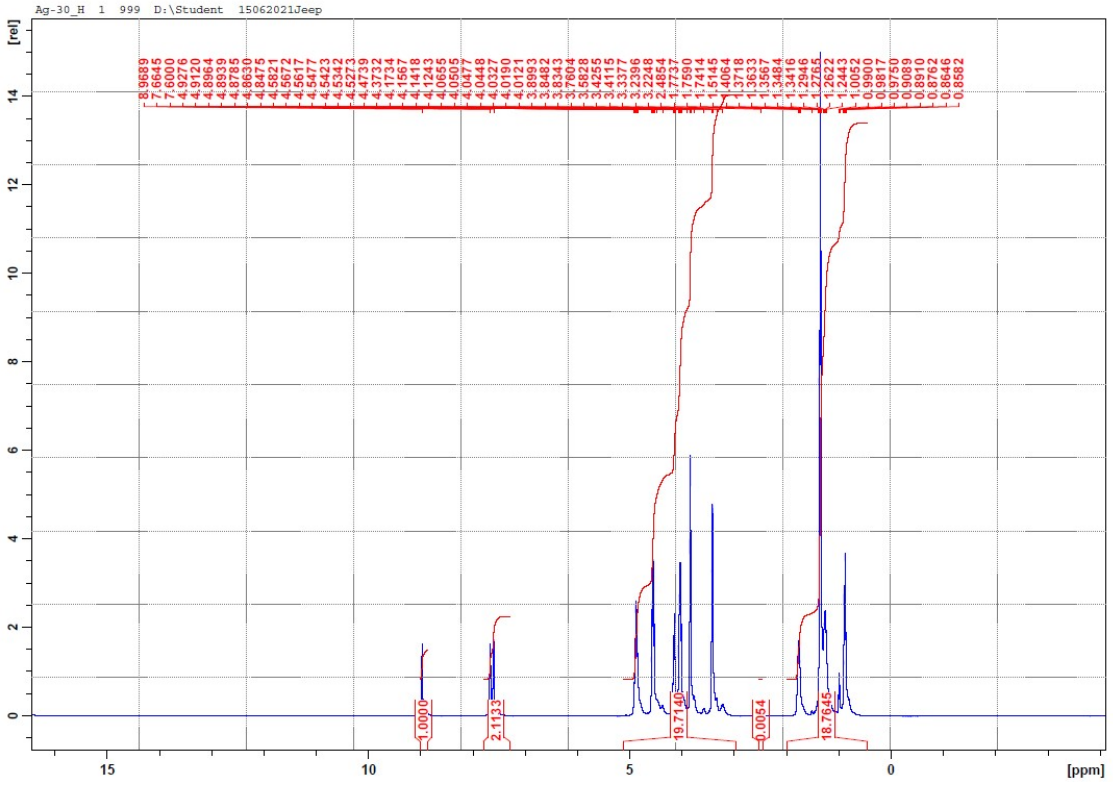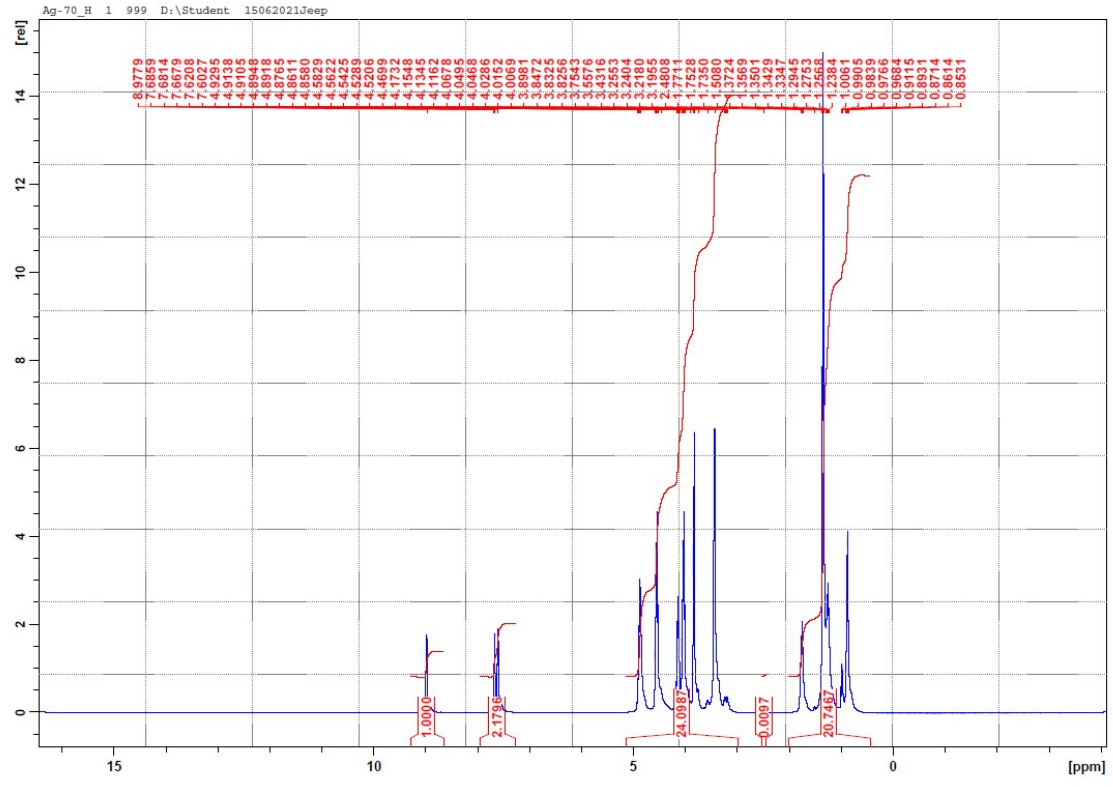

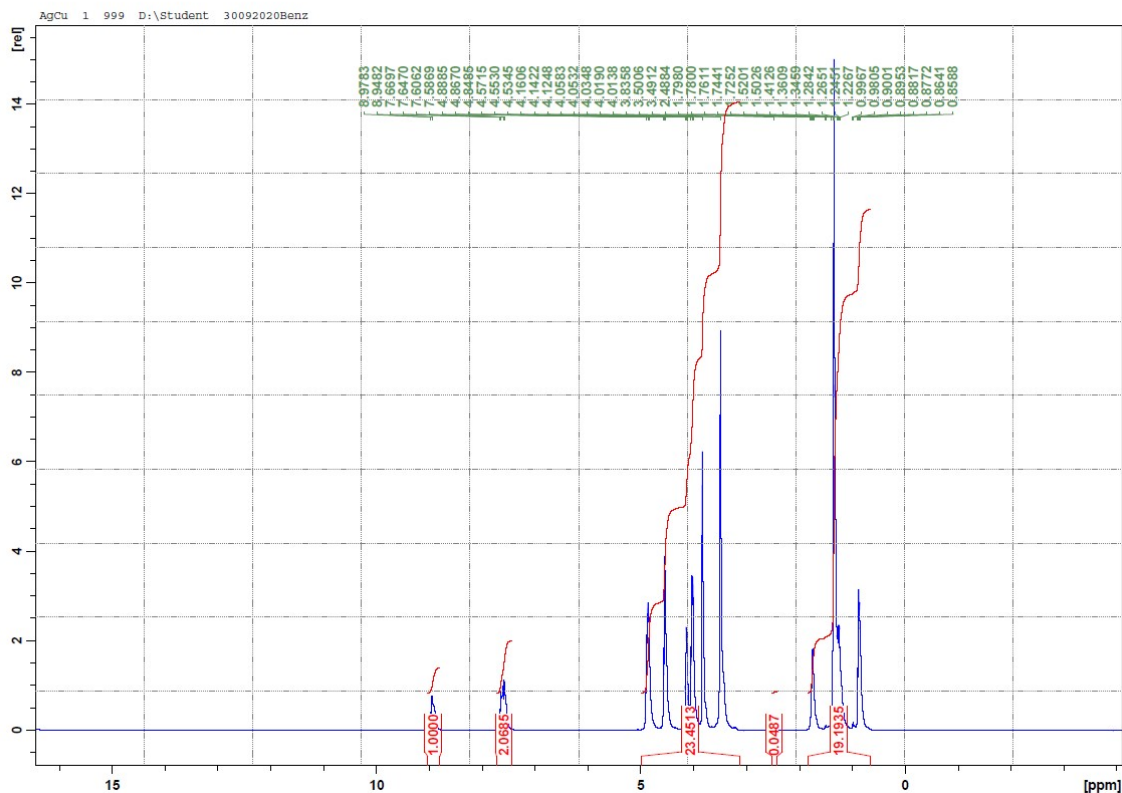

**Figure S4.** (i) Analysis of  $^{13}\text{C}$ -NMR spectra of cathodic electrolytes  $[\text{BMIM}]^+[\text{BF}_4]^-$  and propylene carbonate before  $\text{CO}_2\text{RR}$



| Compounds                                        | Molecular Structure                                                                | Chemical Shift (ppm)        |                             |
|--------------------------------------------------|------------------------------------------------------------------------------------|-----------------------------|-----------------------------|
|                                                  |                                                                                    | Before Reaction<br>(0 mins) | After Reaction<br>(70 mins) |
| Propylene carbonate                              | 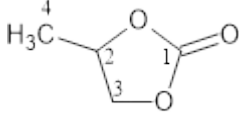  | (C1) 155.37                 | (C1) 155.64                 |
|                                                  |                                                                                    | (C2) 74.16                  | (C2) 74.33                  |
|                                                  |                                                                                    | (C3) 70.88                  | (C3) 70.91                  |
|                                                  |                                                                                    | (C4) 18.95                  | (C4) 18.80                  |
| 1-Butyl-3-methylimidazolium<br>tetrafluoroborate |  | (C2) 136.80                 | (C2) 136.60                 |
|                                                  |                                                                                    | (C4) 122.52                 | (C4) 122.30                 |
|                                                  |                                                                                    | (C5) 123.84                 | (C5) 123.66                 |
|                                                  |                                                                                    | (C6) 48.96                  | (C6) 49.09                  |
|                                                  |                                                                                    | (C7) 31.73                  | (C7) 31.61                  |
|                                                  |                                                                                    | (C8) 19.28                  | (C8) 19.07                  |
|                                                  |                                                                                    | (C9) 13.43                  | (C9) 13.24                  |
| (C10) 35.92                                      | (C10) 35.70                                                                        |                             |                             |

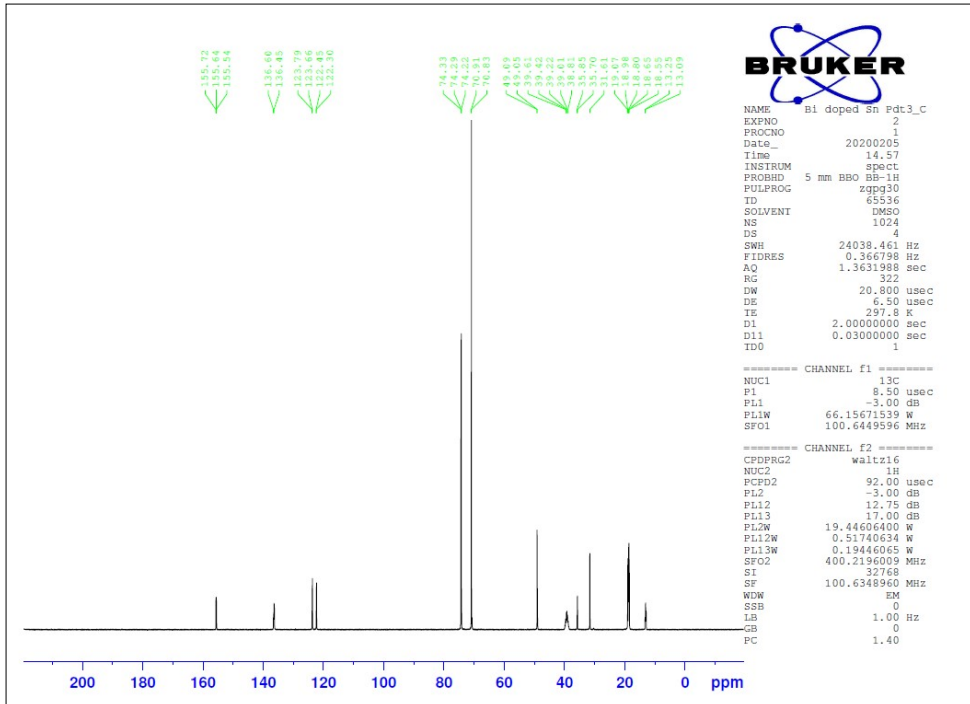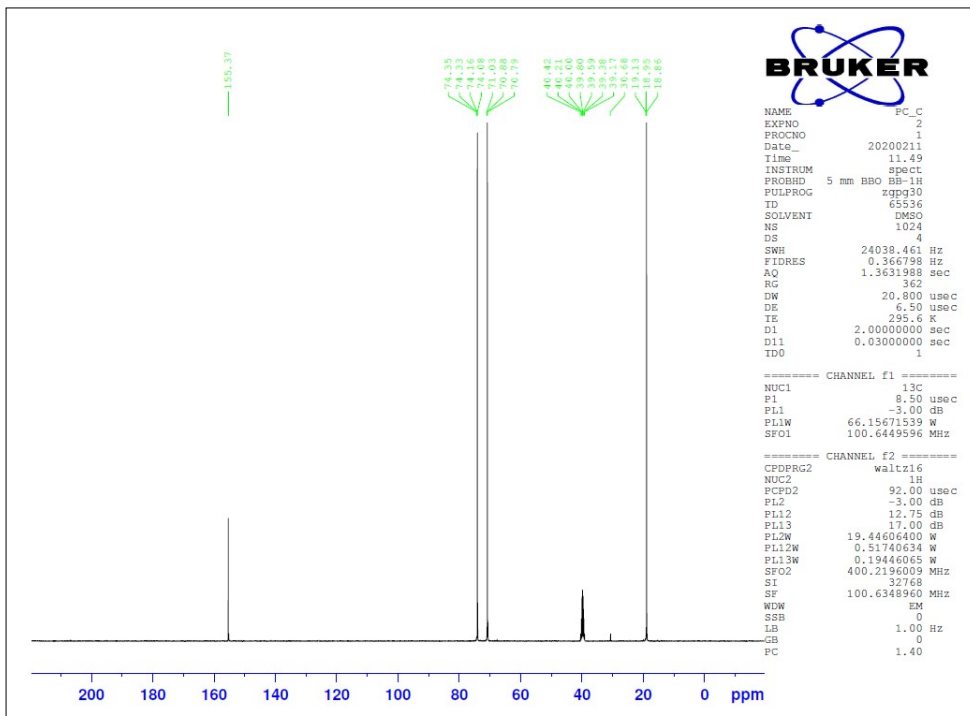

(ii) Analysis of  $^1\text{H-NMR}$  spectra of cathodic electrolytes  $[\text{BMIM}]^+[\text{BF}_4]^-$  and propylene carbonate before  $\text{CO}_2\text{RR}$

| Compounds                                        | Molecular Structure                                                                 | Chemical Shift ( $\delta$ ppm)  |                                 |
|--------------------------------------------------|-------------------------------------------------------------------------------------|---------------------------------|---------------------------------|
|                                                  |                                                                                     | Before Reaction<br>(0 mins)     | After Reaction<br>(70 mins)     |
| Propylene carbonate                              | 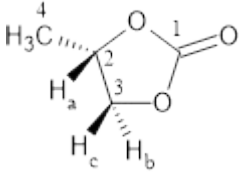   | (H2a, 1H, t)<br>4.88            | (H2a, 1H, t)<br>4.84            |
|                                                  |                                                                                     | (H3b, 1H, dd)<br>4.54, $J=8$ Hz | (H3b, 1H, dd)<br>4.52, $J=8$ Hz |
|                                                  |                                                                                     | (H3c, 1H, dd)<br>4.04, $J=8$ Hz | (H3c, 1H, dd)<br>4.01, $J=8$ Hz |
|                                                  |                                                                                     | (H4, 3H, s) 1.38                | (H4, 3H, s) 1.35                |
| 1-Butyl-3-methylimidazolium<br>tetrafluoroborate |  | (H2, 1H, t) 8.96                | (H2, 1H, t) 8.76                |
|                                                  |                                                                                     | (H5, 1H, t) 7.68                | (H5, 1H, t) 7.53                |
|                                                  |                                                                                     | (H4, 1H, t) 7.61                | (H4, 1H, t) 7.50                |
|                                                  |                                                                                     | (H6, 2H, t) 4.14                | (H6, 2H, t) 4.09                |
|                                                  |                                                                                     | (H7, 2H, m)<br>1.72             | (H7, 2H, m)<br>1.72             |
|                                                  |                                                                                     | (H8, 2H, m)<br>1.24             | (H8, 2H, m)<br>1.29             |
|                                                  |                                                                                     | (H9, 3H, t) 0.87                | (H9, 3H, t) 0.83                |
|                                                  |                                                                                     | (H10, 3H, s) 3.84               | (H10, 3H, s) 3.84               |

(iv) Ref. [BMIM]<sup>+</sup>[BF<sub>4</sub>]<sup>-</sup>

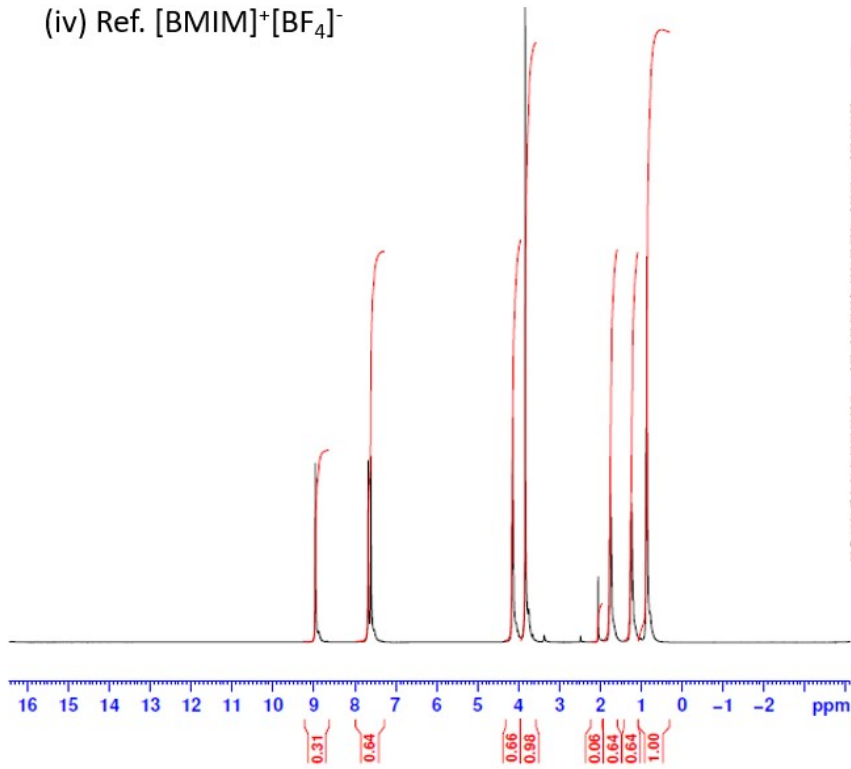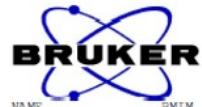

```
NAME      BMIM
EXPNO     2
PROCNO    1
Date_     20200205
Time      11.40
INSTRUM   spect
PROBHD    5 mm BBO BB-1H
PULPROG   zg30
TD        65536
SOLVENT   DMSO
NS        32
DS        2
SWH       8223.685 Hz
FIDRES    0.125483 Hz
AQ        3.9846387 sec
RG        22.6
DW        60.800 usec
DE        6.50 usec
TE        296.9 K
D1        1.0000000 sec
TDO       1
```

```
===== CHANNEL f1 =====
NUC1      1H
P1        15.00 usec
PL1       -3.00 dB
PL1W      19.44606400 W
SFO1      400.2204715 MHz
SI        32768
SF        400.2180010 MHz
WDW       EM
SSB       0
LB        0.30 Hz
GB        0
PC        1.00
```

(v) Ref. Propylene Carbonate

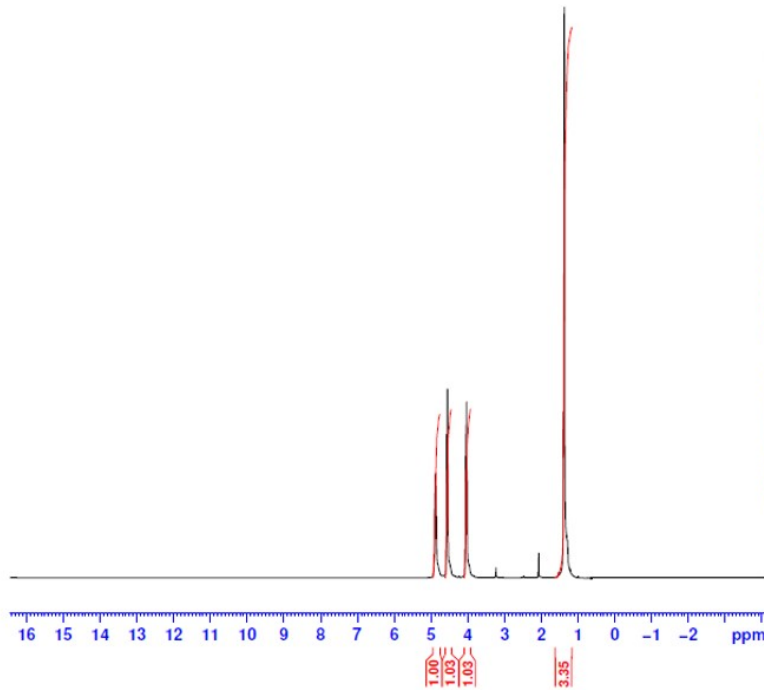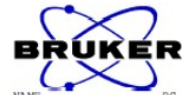

```
NAME      PC
EXPNO     2
PROCNO    1
Date_     20200205
Time      12.08
INSTRUM   spect
PROBHD    5 mm BBO BB-1H
PULPROG   zg30
TD        65536
SOLVENT   DMSO
NS        32
DS        2
SWH       8223.685 Hz
FIDRES    0.125483 Hz
AQ        3.9846387 sec
RG        16
DW        60.800 usec
DE        6.50 usec
TE        297.0 K
D1        1.0000000 sec
TDO       1
```

```
===== CHANNEL f1 =====
NUC1      1H
P1        15.00 usec
PL1       -3.00 dB
PL1W      19.44606400 W
SFO1      400.2204715 MHz
SI        32768
SF        400.2180010 MHz
WDW       EM
SSB       0
LB        0.30 Hz
GB        0
PC        1.00
```

**Figure S5.** Weight of electrodes before and after CO<sub>2</sub>RR

| <b>Sample</b>                  |                           | <b>Weight (g)</b> |
|--------------------------------|---------------------------|-------------------|
| <b>Before CO<sub>2</sub>RR</b> | <b>Ag-electrocatalyst</b> | <b>0.0818</b>     |
| <b>After CO<sub>2</sub>RR</b>  | <b>Ag-10</b>              | <b>0.0835</b>     |
|                                | <b>Ag-30</b>              | <b>0.0838</b>     |
|                                | <b>Ag-70</b>              | <b>0.0841</b>     |
